# Supplementary material
Source: ML conference proceedings conference paper supplement (https://openaccess.thecvf.com/content/cvpr_2015/html/Gupta_KL_Divergence_Based_2015_CVPR_paper.html)
Supplement: Supplementary file 1 [file Gupta_KL_Divergence_Based_2015_CVPR_supplemental.zip]

Archive with 2 entries (2 files):
- 0238-supp/0238-supp.pdf
- 0238-supp/testVideo.mp4
